# Supplementary material
Source: publisher site journal article supplement (https://static.cambridge.org/content/id/urn:cambridge.org:id:article:S1355617719000493/resource/name/S1355617719000493supp001.docx)
Supplement: Supplementary file 1 [file S1355617719000493supp001.docx]

**Supplementary Table 1.** Neurocognitive tests administered by domain.

| **Domain** | **Measure** |
| --- | --- |
| Verbal Fluency | Category Fluency (Animals) |
| Phonemic Fluency (FAS) |
| Working Memory | Paced Auditory Serial Addition Task |
| WAIS–III Letter-Number Sequencing |
| WMS-III Spatial Span |
| Processing Speed | WAIS–III Digit Symbol |
| WAIS–III Symbol Search |
| Trail Making Test Part A |
| Stroop Color Naming |
| Executive Function | Wisconsin Card Sorting Test-64 Perseverative Errors |
| Trail Making Test B |
| Stroop Color-Word Interference Score |
| Halstead Category Test |
| Learning | Hopkins Verbal Learning Test–Revised Total Trials 1-3 |
| Brief Visuospatial Memory Test–Revised Total Trials 1-3 |
| Delayed Recall | Hopkins Verbal Learning Test–Revised) Delayed Recall |
| Brief Visuospatial Memory Test–Revised Delayed Recall |
| Motor skills | Grooved Pegboard Test- Dominant Hand |
| Grooved Pegboard Test- Non-dominant Hand |

*Note.* See Rippeth et al. (2004) for a detailed description of the test battery

**Supplementary Table 2.** Neurocognitive domain performance by methamphetamine-dependence status using demographically-adjusted T scores and impairment rates

| Domain | MA+ (n=87) | MA- (n=114) | Cohen’s *d* | 95% CI Cohen’s *d* | *p* |
| --- | --- | --- | --- | --- | --- |
| *T scores* [Mean (SD)] |  |  |  |  |  |
| **Global** | **47.5 (5.35)** | **49.9 (5.24)** | **-0.45** | **[-0.17, -0.73]** | **.002** |
| Verbal Fluency | 48.9 (8.76) | 50.6 (7.68) | -0.21 | [0.07, -0.49] | .148 |
| **Executive Function** | **46.1 (7.30)** | **49.7 (7.65)** | **-0.48** | **[-0.19, -0.76]** | **.001** |
| Processing Speed | 49.7 (7.37) | 51.5 (7.82) | -0.24 | [0.04, -0.52] | .099 |
| **Learning** | **44.3 (7.31)** | **47.5 (8.17)** | **-0.41** | **[-0.13, -0.69]** | **.004** |
| Delayed Recall | 46.5 (7.13) | 47.0 (7.67) | -0.07 | [0.21, -0.35] | .629 |
| **Working Memory** | **47.3 (8.47)** | **50.4 (8.26)** | **-0.36** | **[-0.08, -0.64]** | **.012** |
| **Motor Skills** | **48.0 (9.97)** | **50.8 (8.95)** | **-0.30** | **[-0.02, -0.58]** | **.040** |
| Domain | MA+ (n=87) | MA- (n=114) | Odds Ratio | 95% CI Odds Ratio | *p* |
| *Impairment* [N (%)] |  |  |  |  |  |
| **Global** | **24 (27.6%)** | **18 (15.8%)** | **2.03** | **[1.02, 4.05]** | **.042** |
| Verbal Fluency | 18 (20.7%) | 16 (14.0%) | 1.60 | [0.76, 3.35] | .214 |
| Executive Function | 29 (33.3%) | 27 (23.7%) | 1.61 | [0.87, 3.00] | .132 |
| Processing Speed | 12 (13.8%) | 8 (7.0%) | 2.12 | [0.83, 5.44] | .114 |
| Learning | 24 (27.6%) | 19 (16.7%) | 1.90 | [0.96, 3.76] | .063 |
| Delayed Recall | 20 (23.0%) | 23 (20.2%) | 1.18 | [0.60, 2.32] | .631 |
| **Working Memory** | **20 (23.0%)** | **14 (12.3%)** | **2.13** | **[1.01, 4.51]** | **.046** |
| Motor Skills | 15 (17.2%) | 13 (11.4%) | 1.60 | [0.72, 3.57] | .249 |
